# Supplementary material for: Multi-walled carbon nanotubes-agarose gel micro-solid phase extraction for the determination of triazine herbicides in water samples
Source: Royal Society of Chemistry journal article supplement (doi:10.1039/c4ay03033h), 2015-01-01
Supplement: c4ay03033h1.pdf [file c4ay03033h1.pdf]

**Electronic Supplementary Information File**

**Multiwalled carbon nanotubes-agarose gel micro-solid phase extraction for the  
determination of triazine herbicides in water samples**

Mohd Marsin Sanagi<sup>a,b,\*</sup>, Mohamad Nazirul Muzakkir Mat Jais<sup>a</sup>, Sazlinda Kamaruzaman<sup>a,c</sup>, Wan

Aini Wan Ibrahim<sup>a</sup>, Umair Baig<sup>a,b</sup>

*<sup>a</sup>Department of Chemistry, Faculty of Science, Universiti Teknologi Malaysia,*

*81310 UTM Johor Bahru, Johor, Malaysia*

*<sup>b</sup>Ibnu Sina Institute for Fundamental Science Studies, Nanotechnology Research Alliance,*

*Universiti Teknologi Malaysia, 81310 UTM Johor Bahru, Johor, Malaysia*

*<sup>c</sup>Department of Chemistry, Faculty of Science, Universiti Putra Malaysia,*

*43400 UPM Serdang Selangor, Malaysia*

*\*Corresponding author, E-mail: marsin@kimia.fs.utm.my (M. M. Sanagi)*

*Tel: +607-5534517 Fax: +607-5566162*

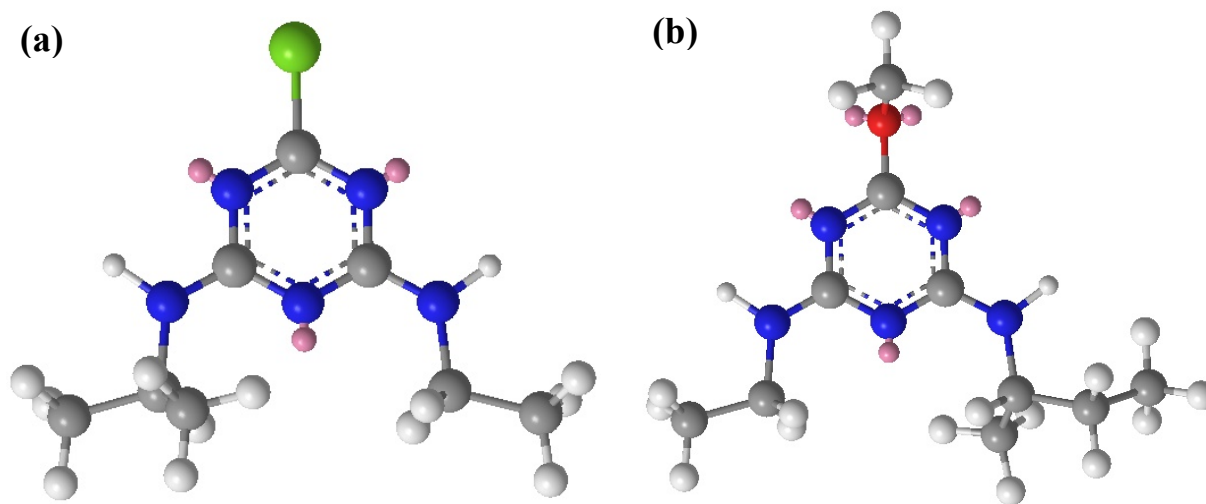

**Fig. S1.** The chemical structures of (a) ATR and (b) SEC.

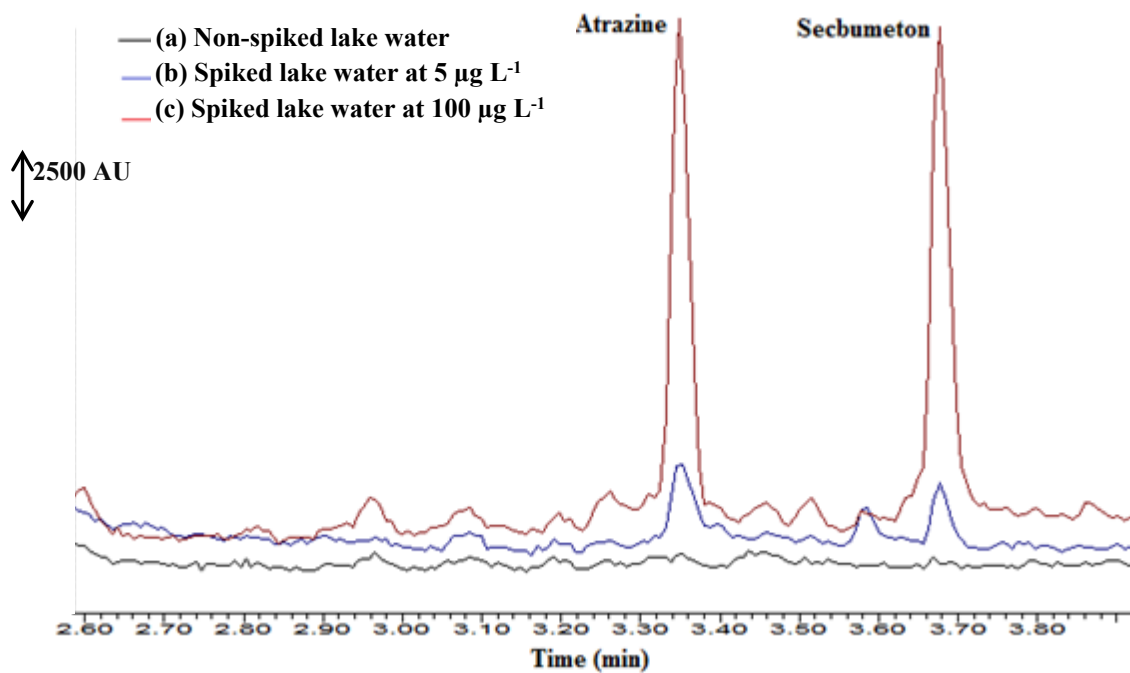

**Fig. S2.** Chromatogram of non-spiked tap water (a), spiked tap water at 5 ppb (b), and spiked tap water at 100 ppb (c) after MWCNTs-AG- $\mu$ SPE under the optimum extraction conditions. GC conditions as in Fig. 6.
